# Supplementary material for: Cell-free DNA comparative analysis of the genomic landscape of first-line hormone receptor-positive metastatic breast cancer from the US and China
Source: PubMed Central journal article supplement (PMC8558197; doi:10.1007/s10549-021-06370-w), 2021-09-01
Supplement: 10549_2021_6370_MOESM1_ESM.pdf [file 10549_2021_6370_MOESM1_ESM.pdf]

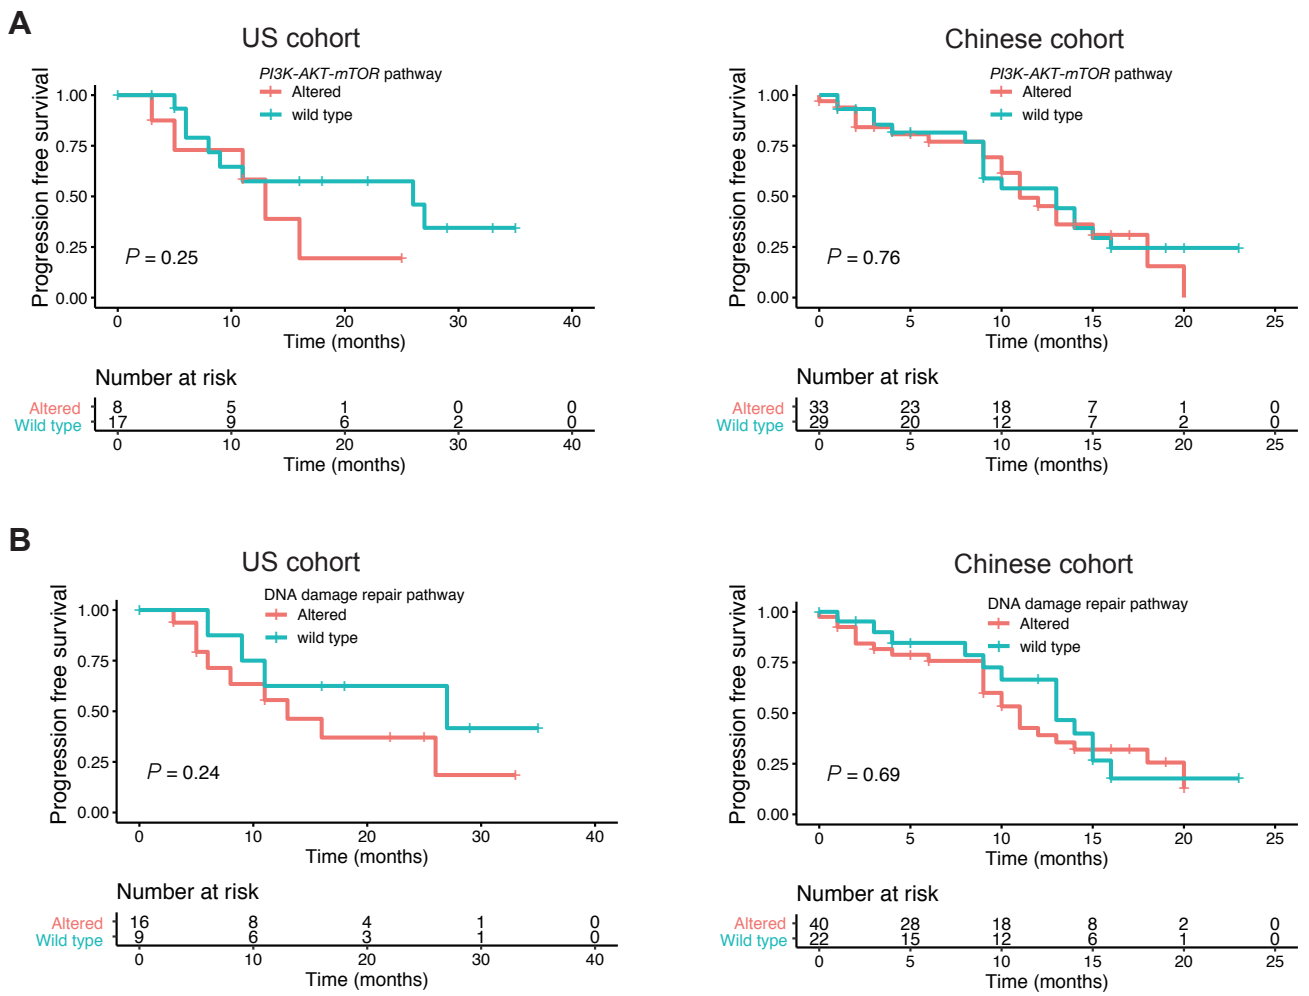

**Supplementary figure 1.** Survival analysis of Chinese and US patients. **A**, Progression free survival (PFS) of patients with or without *PI3K-AKT-mTOR* pathway alteration. **B**, PFS of patients with or without DNA damage repair pathway alteration. *P* value was calculated using log-rank test.

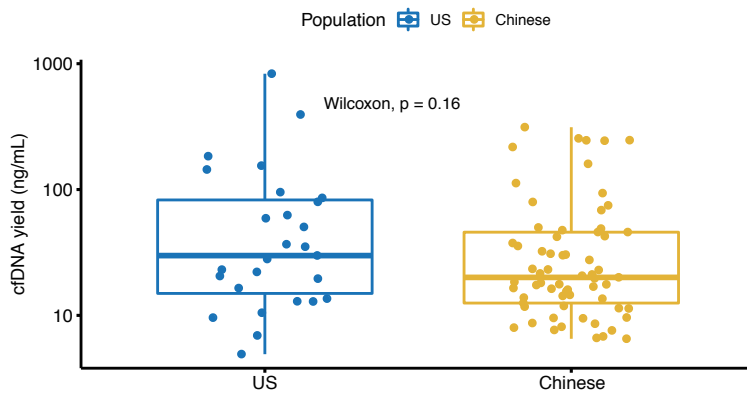

**Supplementary figure 2.** cfDNA yield between US and Chinese patients. *P* value was calculated using Wilcoxon test.
